# Supplementary material
Source: PubMed Central journal article supplement (PMC3666708)
Supplement: 1303916110_pnas.201303916SI.pdf [file 1303916110_pnas.201303916SI.pdf]

# Supporting Information

Jung et al. 10.1073/pnas.1303916110

## SI Materials and Methods

**Wound-Healing Assay.** Primary mouse embryonic fibroblast (MEF) cells were plated in 24-well plates with glass coverslips and grown to confluency. Cells were then scraped with a sterile p1000 pipette tip, washed with PBS, and incubated with fresh culture medium at 37 °C for 4 h. Cells were then fixed and stained for immunofluorescence microscopy.

**Protein Sequence Alignment.** Protein sequences of mouse lamin B1 (ENSMUSP00000025486) and mouse lamin B2 (ENSMUSP00000136524) were aligned using Clustal Omega (v1.1.0) with the default setting ([www.ebi.ac.uk/Tools/msa/clustalo/](http://www.ebi.ac.uk/Tools/msa/clustalo/)).

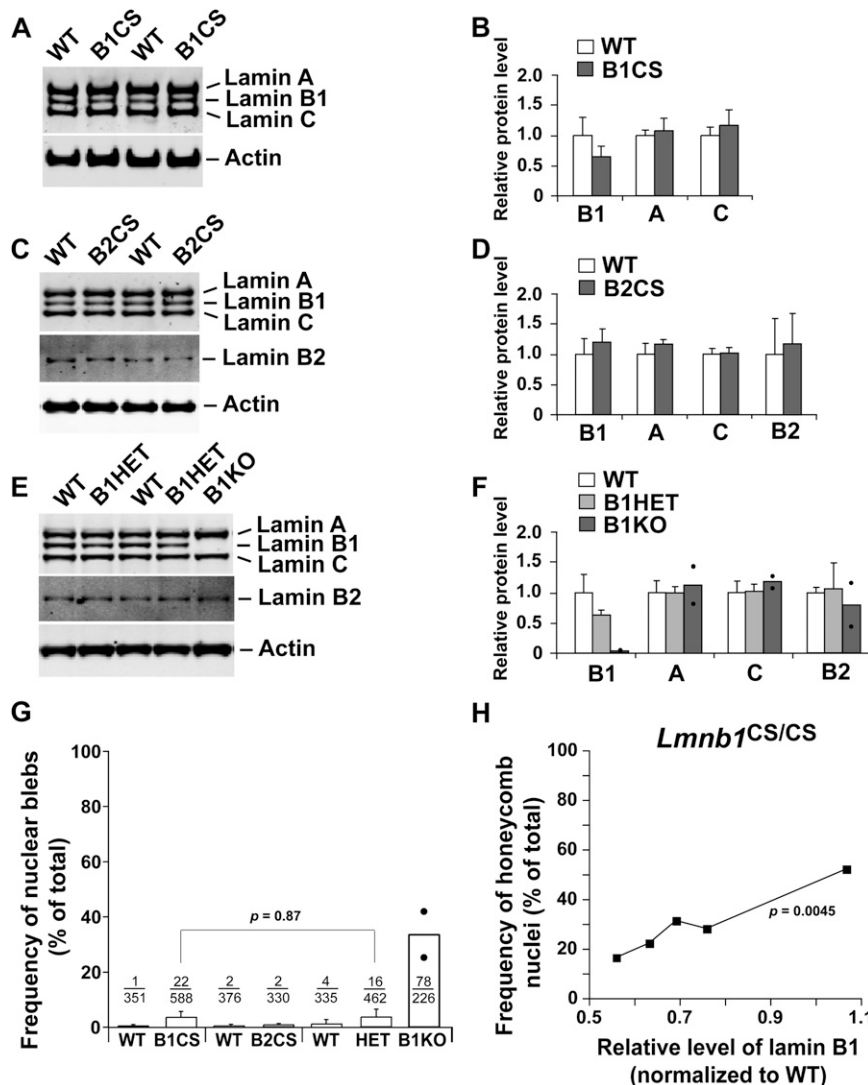

**Fig. S1.** Levels of nuclear lamin proteins and nuclear shape abnormalities in *Lmnb1*<sup>CS/CS</sup> and *Lmnb2*<sup>CS/CS</sup> MEFs. (A–F) Western blots (A, C, E) and quantification of lamin protein levels relative to actin (B, D, F) in WT, *Lmnb1*<sup>CS/CS</sup> (B1CS), *Lmnb2*<sup>CS/CS</sup> (B2CS), *Lmnb1*<sup>+/-</sup> (B1HET), and *Lmnb1*<sup>-/-</sup> (B1KO) MEFs (mean ± SD). The levels of lamin B1 in *Lmnb1*<sup>CS/CS</sup> MEFs were ~35% lower than in wild-type cells (B) ( $P = 0.06$ ) and similar to levels of lamin B1 in *Lmnb1*<sup>+/-</sup> cells (F) (where the levels were ~37% lower than in wild-type cells;  $P = 0.06$ ). (G) Frequency of nuclear blebs in the MEFs that were analyzed in Fig. 2 A–F. The frequency of nuclear blebs in *Lmnb1*<sup>-/-</sup> MEFs was higher than in wild-type MEFs ( $P < 0.0001$ ). Frequencies of blebs in *Lmnb1*<sup>CS/CS</sup> and *Lmnb1*<sup>+/-</sup> cells were similar ( $P = 0.87$ ); both were higher than in wild-type cells ( $P < 0.0001$ ). Values represent mean ± SD. (H) Correlation between levels of nonfarnesylated lamin B1 and the frequency of honeycomb nuclei in *Lmnb1*<sup>CS/CS</sup> MEF cell lines (used in G and Fig. 2G). The frequency of honeycomb nuclei in *Lmnb1*<sup>CS/CS</sup> MEFs was positively correlated with lamin B1 levels ( $P = 0.0045$ ).

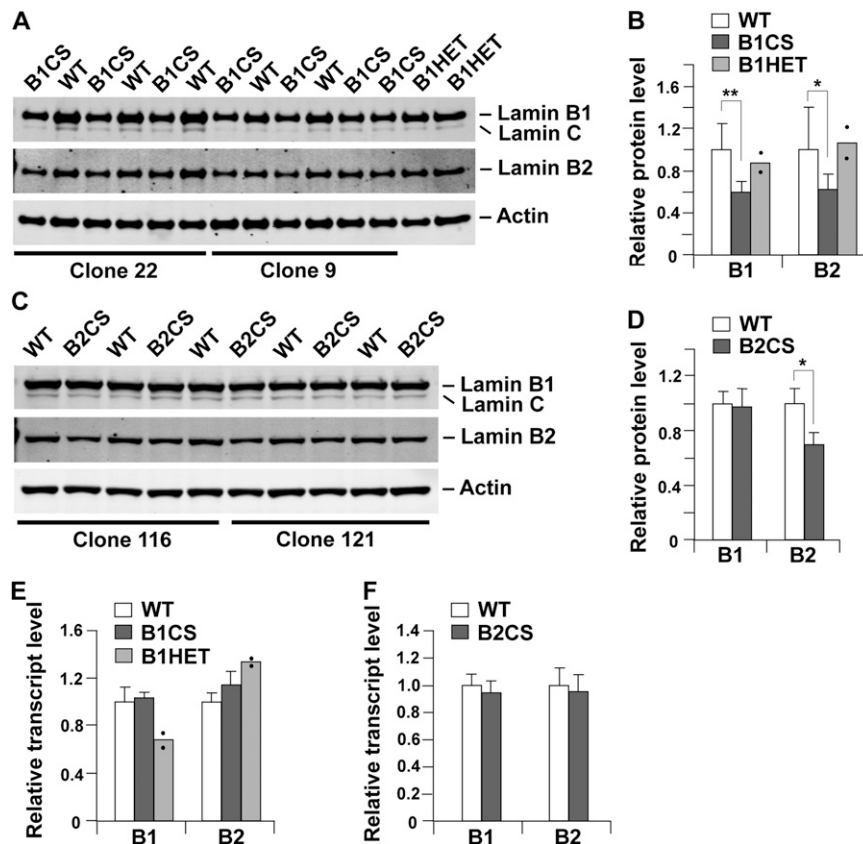

**Fig. S2.** Absence of the farnesyl lipid anchor lowers steady-state levels of lamin B1 and lamin B2 in the cortex. (*A* and *B*) Western blot analysis and quantification of lamin B1 and B2 levels in the cerebral cortex of embryonic day (E) 19 to postnatal day (P) 1 *Lmnb1*<sup>+/+</sup> (WT), *Lmnb1*<sup>CS/CS</sup> (B1CS), and *Lmnb1*<sup>+/-</sup> (B1HET) mice. Lamin B1 and lamin B2 levels were normalized to actin levels. Lamin B1 levels were ~40% lower in *Lmnb1*<sup>CS/CS</sup> mice than in wild-type mice; this was the case in knock-in mice derived from two different ES cell lines (clones 22 and 9). *Lmnb1*<sup>+/+</sup>, *n* = 5; *Lmnb1*<sup>CS/CS</sup>, *n* = 7; *Lmnb1*<sup>+/-</sup>, *n* = 2. Values represent mean ± SD. \**P* < 0.05; \*\**P* < 0.005. (*C* and *D*) Western blot analysis and quantification of lamin B1 and lamin B2 levels in the cerebral cortex of E19–P1 *Lmnb2*<sup>+/+</sup> (WT) and *Lmnb2*<sup>CS/CS</sup> (B2CS) mice. Values represent mean ± SD *Lmnb2*<sup>+/+</sup>, *n* = 5; *Lmnb2*<sup>CS/CS</sup>, *n* = 5. Lamin B1 and lamin B2 levels were normalized to actin. Lamin B2 levels were ~30% lower in *Lmnb2*<sup>CS/CS</sup> mice than in wild-type mice; this was the case in mice generated from two ES cell lines (clones 116 and 121). \**P* < 0.005. (*E* and *F*) Quantitative RT-PCR analysis of *Lmnb1* and *Lmnb2* transcript levels in the cerebral cortex of E19–P1 *Lmnb1*<sup>+/+</sup> (WT), *Lmnb1*<sup>CS/CS</sup> (B1CS), *Lmnb1*<sup>+/-</sup> (B1HET), *Lmnb2*<sup>+/+</sup> (WT), and *Lmnb2*<sup>CS/CS</sup> (B2CS) mice. Transcript levels were normalized to cyclophilin A and compared with levels in wild-type mice (set at 1.0). Values represent mean ± SD. *Lmnb1*<sup>+/+</sup>, *n* = 5; *Lmnb1*<sup>CS/CS</sup>, *n* = 7; *Lmnb1*<sup>+/-</sup>, *n* = 2; *Lmnb2*<sup>+/+</sup>, *n* = 5; *Lmnb2*<sup>CS/CS</sup>, *n* = 5.

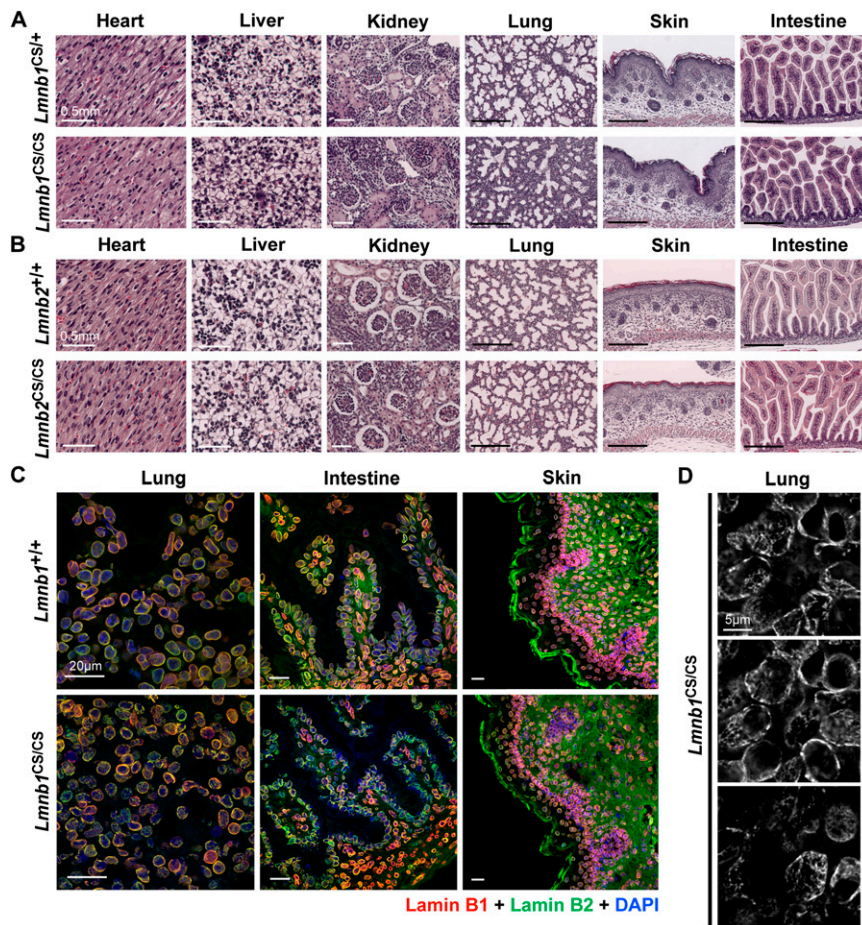

**Fig. S3.** Histological and immunohistochemical examination of tissues from *Lmnb1*<sup>CS/CS</sup> and *Lmnb2*<sup>CS/CS</sup> embryos. (A and B) H&E staining of the heart, liver, kidney, lung, skin, and intestine from *Lmnb1*<sup>CS/+</sup>, *Lmnb1*<sup>CS/CS</sup>, *Lmnb2*<sup>+/+</sup>, and *Lmnb2*<sup>CS/CS</sup> mice at E19–P1. The lungs of *Lmnb1*<sup>CS/CS</sup> mice appeared immature with fewer alveoli and thicker interstitial spaces as described earlier in *Lmnb1* knockout mice (1). No pathology was detected in the other tissues. (Scale bars, 0.5 mm.) (C) Immunofluorescence microscopy of the lung, intestine, and skin from *Lmnb1*<sup>+/+</sup> and *Lmnb1*<sup>CS/CS</sup> embryos (E19–P1). Frozen tissue sections were stained with antibodies against lamin B1 (red) and lamin B2 (green). DNA was stained with DAPI (blue). Images along the z axis were captured and merged with Zen 2010 software (Zeiss). Both lamin B1 and lamin B2 were located mainly at the nuclear rim in the skin of *Lmnb1*<sup>CS/CS</sup> embryos. The cell nuclei in the lung and intestine of *Lmnb1*<sup>CS/CS</sup> mice exhibited a honeycomb distribution of B-type lamins (similar to the finding in MEFs) (Fig. 2E). (Scale bars, 20  $\mu$ m.) (D) Higher-magnification images of individual optical sections of the lung from *Lmnb1*<sup>CS/CS</sup> mice illustrating the nuclear honeycomb phenotype. The distribution of lamin B1 (white) within cells is shown. (Scale bar, 5  $\mu$ m.)

1. Vergnes L, Péterfy M, Bergo MO, Young SG, Reue K (2004) Lamin B1 is required for mouse development and nuclear integrity. *Proc Natl Acad Sci USA* 101(28):10428–10433.

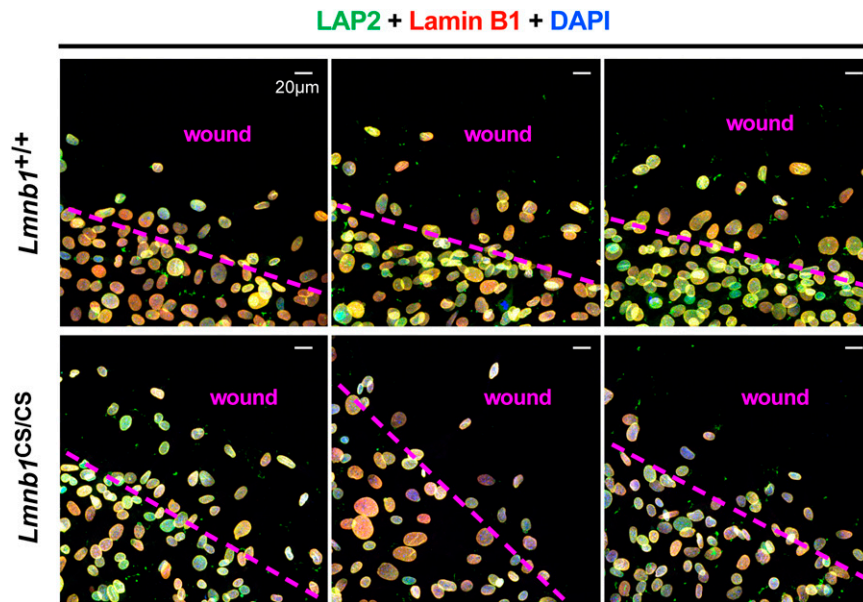

**Fig. S4.** Wound-healing assay with *Lmnb1*<sup>+/+</sup> and *Lmnb1*<sup>CS/CS</sup> MEFs. Confluent monolayers were scraped, with the goal of visualizing cells that migrate in and close the “wound.” Cells were stained with antibodies against LAP2β (lamin-associated polypeptide 2; green) and lamin B1 (red); DNA was stained with DAPI (blue). The edge of the initial wound is indicated with a dashed line (magenta). The shapes of cell nuclei in migrating *Lmnb1*<sup>CS/CS</sup> MEFs were essentially normal, and no dumbbell-shaped nuclei were observed. (Scale bars, 20 μm.)

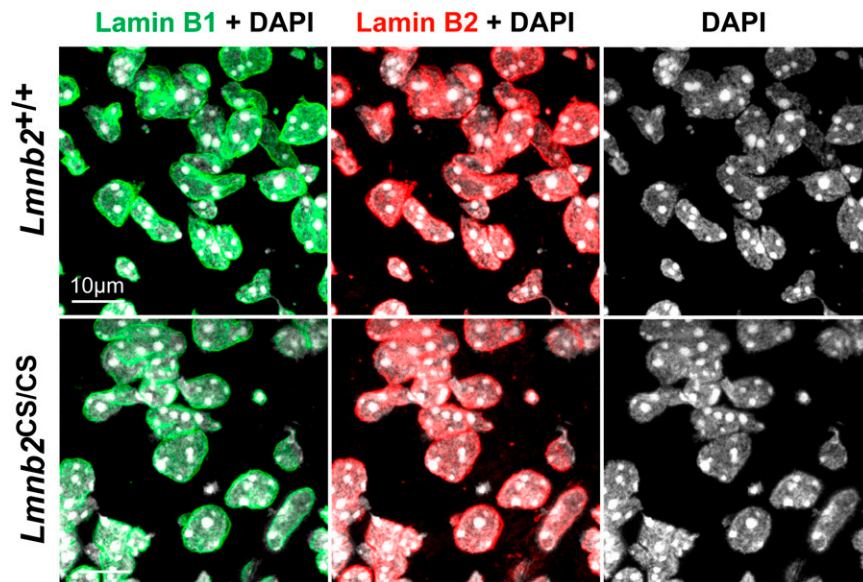

**Fig. S5.** Immunofluorescence microscopy of the midbrain (superior colliculus) from E19–P1 *Lmnb2*<sup>+/+</sup> and *Lmnb2*<sup>CS/CS</sup> embryos. Sections were stained with antibodies against lamin B1 (green) and lamin B2 (red); DNA was stained with DAPI (white). No dumbbell-shaped nuclei and naked chromatin were observed in *Lmnb2*<sup>CS/CS</sup> midbrains. (Scale bar, 10 μm.)

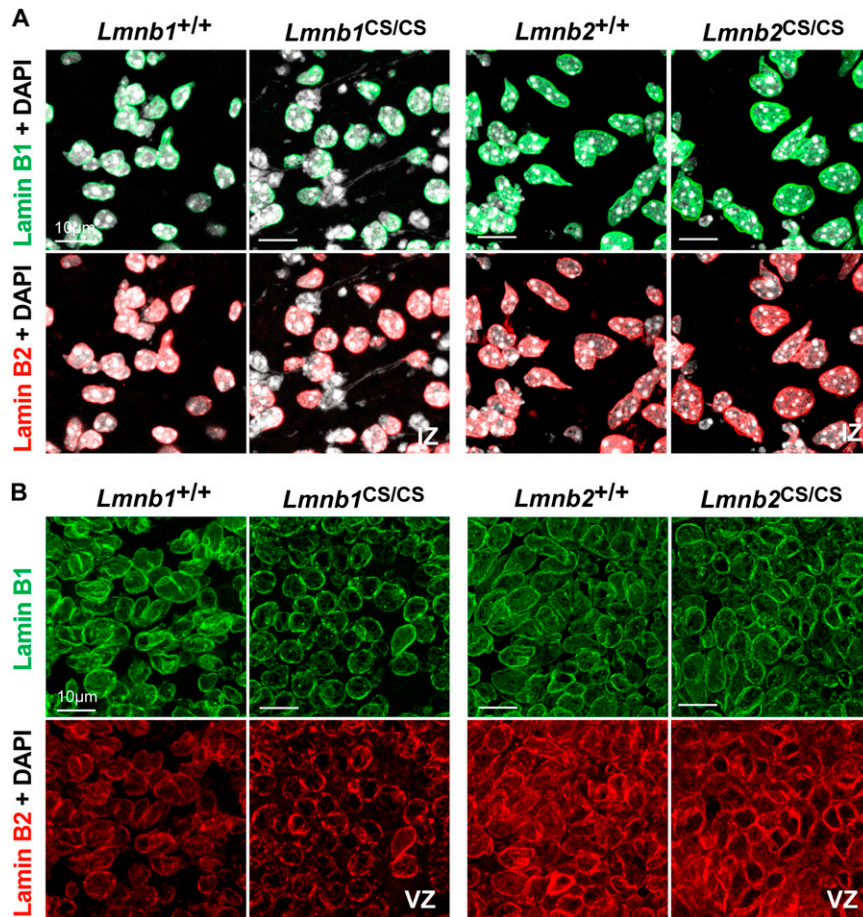

**Fig. S6.** Immunofluorescence microscopy of the cerebral cortex from E19–P1 *Lmnb1*<sup>+/+</sup>, *Lmnb1*<sup>CS/CS</sup>, *Lmnb2*<sup>+/+</sup>, and *Lmnb2*<sup>CS/CS</sup> embryos. Frozen sections were stained with antibodies against lamin B1 (green) and lamin B2 (red); DNA was stained with DAPI (white). (A) Intermediate zone (IZ) of the cerebral cortex, showing dumbbell-shaped nuclei and “naked chromatin” in *Lmnb1*<sup>CS/CS</sup> embryos. (B) Ventricular zone (VZ), showing honeycomb distribution of lamin B1 in *Lmnb1*<sup>CS/CS</sup> embryos. No nuclear abnormalities were found in *Lmnb2*<sup>CS/CS</sup> embryos. (Scale bars, 10  $\mu$ m.)



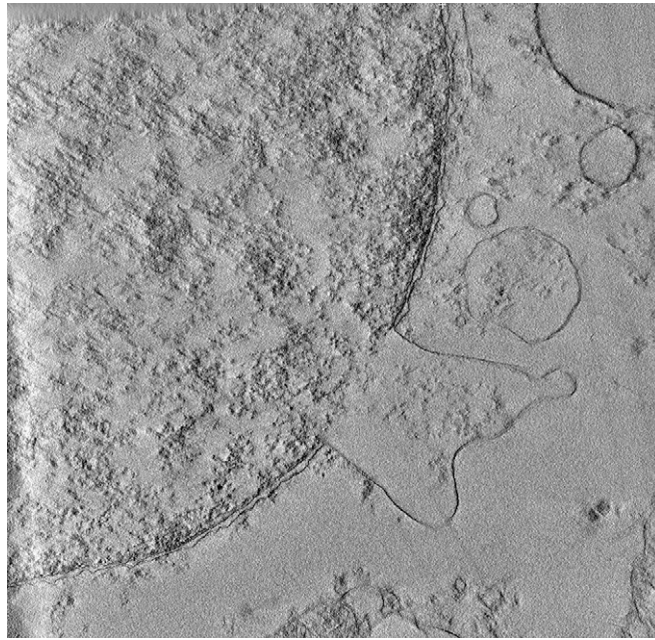

**Movie S1.** EM tomography of the cerebral cortex of an *Lmnb1*<sup>CS/CS</sup> embryo illustrating a nuclear bleb surrounded by an inner and outer nuclear membrane. (See Fig. 8D for the scale bar.)

[Movie S1](#)
